# Supplementary material
Source: PubMed Central journal article supplement (PMC4200257)
Supplement: supp_M114.602474_jbc.M114.602474-1.pdf [file supp_M114.602474_jbc.M114.602474-1.pdf]

**Table S1: Quantitative PCR Primers Used in this Study:**

**Primers to amplify Human Genes:**

| GENE                    | Forward Primer         | Reverse Primer        |
|-------------------------|------------------------|-----------------------|
| MX2                     | GCATCCACCTGAATGCCTAC   | ATCATGGCTTTCTGCAAGGA  |
| CEACAM1                 | TTGTGAATGAAGAAGCAACTGG | TCCACAGGGTTGGAGTTGTT  |
| XAF1                    | CCTGCCGATCCTAAATCAAC   | AGGCAGGAATGCCAGTGTTA  |
| HPRT1 (Reference probe) | TGACACTGGCAAAACAATGC   | AACACTTCGTGGGGTCTCTTT |

**Primers to amplify Mouse Genes:**

| GENE                     | Forward Primer           | Reverse Primer          |
|--------------------------|--------------------------|-------------------------|
| MX1                      | GGATAATCAGAGGGATCTGTCTCC | AGGCATTAATAAACCTGCTACCT |
| MX2                      | CCAGCATCTGAATGCCTACC     | GCTGCAGGAATCCTTGTCTCT   |
| CMPK2                    | GGCAATTATCTCGTGGCTTC     | GTGGCTGTGCTATGCCAGTA    |
| CXCL10                   | AAGGAGCCCTTTTAGACCTTTTT  | CCACGATGAAAAAGAATGATGA  |
| IFIT1                    | CAAGGCAGGTTTCTGAGGAG     | TGGTCACCATCAGCATTCTC    |
| IRF7                     | TCGACTTCAGCACTTTCTTCC    | TCCAGCTTCACCAGGATCA     |
| USP18                    | CGTGGATGGAAAGTGGTTCT     | CCAAGAGATAGGCCGTTTCC    |
| RSAD2                    | CAGCCTTATCCGGGAGAGAT     | AACCTGCTCATCGAAGCTGT    |
| GBP1                     | GAGAAGATGGAGCAGGAACG     | TTGCAAGCTCTCATTCTGGA    |
| OAS2                     | TGCGGAAGTTCTACTGACC      | GGTCACCTCCTCCACATC      |
| XAF1                     | GCTGATCTTCCCACAGGAGA     | GGTGAGCTAACCTCTGGCACT   |
| CD4                      | CACACACCTGTGCAAGAAGC     | TAAGAGAGATGGCTCGGCAC    |
| CD8 (CD8B1)              | CCAAGATGGTCTTTGGGACA     | CTTGGTTGGGGCAGTTGTAG    |
| CD11B (ITGAM)            | GGAGAATTTCCGTACCTGGG     | GTATTGCCATCAGCGTCCAT    |
| CD19                     | TGTCTCCGAGGAAACCTGAC     | CTGGGACTATCCATCCACCA    |
| ACTB (Reference probe)   | ACCCAGATCATGTTTGAGACCT   | ACCAGAGGCATACAGGGACAG   |
| HPRT1 (Reference probe)  | AGCAGTACAGCCCCAAAATG     | GGCCTGTATCCAACACTTCG    |
| POLR2A (Reference probe) | GAGTCTGAGTCCGGATGAA      | GACCTCCCTCCGTTGTTTCT    |
| TAF1 (Reference probe)   | AACCTGATTCTGGCCAACAG     | CGTTCACAATCTCCTGAGCA    |
